# Supplementary material for: Determination of Minimum Miscibility Pressure of CO2–Oil System: A Molecular Dynamics Study
Source: MDPI journal article supplement (doi:10.3390/molecules26164983), 2021-08-17

**Table S1**

The number of CO<sub>2</sub> molecules added in different systems.

|        | 333 K | 343 K | 353 K | 363 K | 373 K |
|--------|-------|-------|-------|-------|-------|
| 10 MPa | 561   | 481   | 428   | 392   | 362   |
| 15 MPa | 1166  | 980   | 830   | 720   | 640   |
| 20 MPa | 1395  | 1274  | 1145  | 1032  | 925   |
| 25 MPa | 1517  | 1421  | 1321  | 1229  | 1131  |
| 30 MPa | 1597  | 1519  | 1436  | 1358  | 1275  |
| 35 MPa | 1663  | 1594  | 1518  | 1448  | 1382  |

**Table S2**Integrated values of CO<sub>2</sub> and crude oil at different temperatures.**(a) 333 K**

| Time (ns) | 10 MPa          |           | 15 MPa          |           | 20 MPa          |           | 25 MPa          |           | 30 MPa          |           | 35 MPa          |           |
|-----------|-----------------|-----------|-----------------|-----------|-----------------|-----------|-----------------|-----------|-----------------|-----------|-----------------|-----------|
|           | CO <sub>2</sub> | Crude Oil |
| 0.5       | 14.443          | 272.264   | 28.931          | 158.919   | 33.432          | 128.571   | 32.878          | 110.210   | 38.153          | 109.541   | 38.787          | 98.325    |
| 1.0       | 21.492          | 294.619   | 39.498          | 185.950   | 48.890          | 160.622   | 46.969          | 140.515   | 50.803          | 136.343   | 52.304          | 129.914   |
| 1.5       | 28.359          | 305.306   | 50.763          | 211.987   | 59.923          | 186.987   | 56.359          | 162.302   | 66.302          | 170.264   | 68.176          | 156.352   |
| 2.0       | 33.157          | 314.444   | 57.705          | 225.626   | 67.863          | 203.661   | 68.770          | 186.748   | 74.466          | 190.578   | 71.132          | 169.471   |
| 2.5       | 39.082          | 327.616   | 64.456          | 237.826   | 71.482          | 216.015   | 74.454          | 200.596   | 78.499          | 198.468   | 78.032          | 180.574   |
| 3.0       | 42.094          | 335.113   | 67.483          | 247.023   | 75.460          | 223.075   | 80.436          | 211.153   | 89.346          | 223.901   | 80.508          | 184.499   |
| 3.5       | 43.112          | 332.648   | 73.509          | 261.916   | 82.019          | 237.031   | 86.322          | 227.134   | 92.939          | 228.390   | 86.623          | 198.655   |
| 4.0       | 45.348          | 338.111   | 73.750          | 256.954   | 82.594          | 241.453   | 91.647          | 241.193   | 93.179          | 232.188   | 92.367          | 212.714   |
| 4.5       | 46.117          | 346.222   | 77.709          | 266.948   | 89.376          | 249.416   | 91.847          | 242.394   | 94.941          | 236.370   | 97.584          | 222.462   |
| 5.0       | 47.102          | 343.009   | 77.130          | 263.264   | 90.875          | 254.557   | 93.538          | 243.007   | 92.325          | 228.591   | 101.723         | 227.953   |
| 5.5       | 48.799          | 350.188   | 80.710          | 274.261   | 88.832          | 252.105   | 97.410          | 247.929   | 95.334          | 237.317   | 99.341          | 238.013   |
| 6.0       | 48.811          | 348.790   | 78.829          | 273.827   | 87.930          | 250.641   | 98.908          | 254.503   | 100.199         | 245.945   | 100.435         | 239.173   |
| 6.5       | 48.384          | 348.543   | 80.460          | 272.605   | 89.325          | 253.517   | 97.387          | 250.752   | 102.128         | 248.867   | 99.494          | 239.680   |
| 7.0       | 48.804          | 346.455   | 80.923          | 275.342   | 92.203          | 259.613   | 102.214         | 256.880   | 101.798         | 246.223   | 99.172          | 245.784   |
| 7.5       | 47.005          | 346.649   | 82.952          | 274.548   | 94.707          | 260.369   | 101.908         | 258.578   | 101.653         | 248.178   | 99.875          | 249.235   |
| 8.0       | 50.719          | 351.596   | 81.615          | 273.358   | 93.055          | 257.972   | 97.952          | 251.563   | 100.078         | 239.190   | 101.954         | 251.553   |
| 8.5       | 50.755          | 352.054   | 81.546          | 275.911   | 90.213          | 253.704   | 101.197         | 254.065   | 98.105          | 242.699   | 102.987         | 250.852   |
| 9.0       | 50.060          | 350.345   | 79.959          | 273.986   | 92.764          | 260.442   | 101.037         | 260.470   | 95.721          | 239.173   | 107.992         | 256.589   |
| 9.5       | 52.517          | 354.282   | 84.857          | 283.126   | 95.516          | 266.566   | 100.916         | 260.795   | 100.242         | 247.688   | 108.208         | 239.513   |
| 10.0      | 53.752          | 358.128   | 84.359          | 283.229   | 93.776          | 259.894   | 104.237         | 263.485   | 101.767         | 248.950   | 108.480         | 241.170   |

**(b) 343 K**

| Time (ns) | 10 MPa          |           | 15 MPa          |           | 20 MPa          |           | 25 MPa          |           | 30 MPa          |           | 35 MPa          |           |
|-----------|-----------------|-----------|-----------------|-----------|-----------------|-----------|-----------------|-----------|-----------------|-----------|-----------------|-----------|
|           | CO <sub>2</sub> | Crude Oil |
| 0.5       | 9.074           | 290.130   | 21.401          | 176.381   | 31.383          | 136.704   | 34.279          | 122.637   | 32.218          | 106.767   | 33.117          | 99.583    |
| 1.0       | 15.130          | 308.378   | 35.204          | 210.260   | 47.194          | 180.808   | 46.635          | 156.025   | 47.745          | 139.635   | 46.682          | 132.063   |
| 1.5       | 21.399          | 319.247   | 44.938          | 234.297   | 55.826          | 199.892   | 59.359          | 186.618   | 61.465          | 176.167   | 56.508          | 152.474   |
| 2.0       | 28.407          | 332.406   | 53.483          | 252.039   | 62.943          | 217.888   | 71.253          | 210.674   | 72.511          | 196.256   | 70.641          | 182.538   |
| 2.5       | 31.078          | 341.763   | 56.822          | 255.173   | 71.291          | 233.104   | 79.114          | 226.230   | 76.715          | 206.282   | 78.696          | 200.705   |
| 3.0       | 33.829          | 347.076   | 61.942          | 269.311   | 76.320          | 243.602   | 81.335          | 228.749   | 81.058          | 218.887   | 85.258          | 211.027   |
| 3.5       | 35.681          | 347.157   | 66.782          | 277.060   | 76.289          | 249.509   | 88.238          | 244.197   | 87.964          | 227.477   | 90.967          | 224.343   |
| 4.0       | 39.567          | 357.790   | 65.641          | 279.345   | 80.411          | 256.177   | 90.381          | 246.877   | 90.888          | 239.222   | 95.851          | 234.164   |
| 4.5       | 44.117          | 365.759   | 70.431          | 284.334   | 84.516          | 263.872   | 91.820          | 248.197   | 91.730          | 235.055   | 93.432          | 231.601   |
| 5.0       | 46.099          | 372.195   | 69.170          | 281.458   | 80.411          | 253.330   | 92.813          | 257.732   | 92.564          | 236.602   | 96.466          | 239.237   |
| 5.5       | 45.131          | 370.122   | 71.125          | 290.068   | 82.275          | 254.428   | 96.027          | 260.440   | 95.699          | 246.298   | 97.390          | 243.812   |
| 6.0       | 44.894          | 368.475   | 74.681          | 292.178   | 83.478          | 259.084   | 95.221          | 263.963   | 95.120          | 245.172   | 99.185          | 244.041   |
| 6.5       | 43.398          | 361.123   | 73.986          | 296.979   | 84.784          | 262.730   | 99.575          | 267.199   | 95.932          | 242.796   | 102.766         | 250.360   |
| 7.0       | 43.104          | 364.076   | 74.499          | 292.854   | 88.540          | 273.075   | 98.076          | 264.375   | 97.992          | 250.438   | 105.167         | 253.317   |
| 7.5       | 43.955          | 367.485   | 73.092          | 296.819   | 86.457          | 268.137   | 95.204          | 260.682   | 100.329         | 255.534   | 103.508         | 252.944   |
| 8.0       | 44.503          | 368.082   | 76.151          | 302.365   | 89.237          | 268.049   | 95.424          | 262.818   | 101.959         | 260.702   | 103.434         | 251.217   |
| 8.5       | 46.483          | 373.051   | 74.050          | 293.946   | 86.282          | 261.652   | 90.880          | 253.776   | 99.743          | 254.441   | 103.469         | 251.351   |
| 9.0       | 43.127          | 362.749   | 74.894          | 297.197   | 90.116          | 275.434   | 90.776          | 254.005   | 100.968         | 254.264   | 105.072         | 253.969   |
| 9.5       | 44.195          | 375.224   | 77.167          | 301.548   | 91.938          | 278.280   | 97.964          | 262.618   | 101.384         | 257.275   | 104.251         | 252.405   |
| 10.0      | 43.669          | 369.369   | 76.905          | 296.149   | 95.245          | 282.528   | 94.998          | 256.929   | 101.487         | 257.473   | 102.721         | 246.992   |

(c) 353 K

| Time (ns) | 10 MPa          |           | 15 MPa          |           | 20 MPa          |           | 25 MPa          |           | 30 MPa          |           | 35 MPa          |           |
|-----------|-----------------|-----------|-----------------|-----------|-----------------|-----------|-----------------|-----------|-----------------|-----------|-----------------|-----------|
|           | CO <sub>2</sub> | Crude Oil |
| 0.5       | 10.707          | 293.716   | 21.286          | 206.799   | 28.675          | 158.879   | 33.055          | 130.118   | 38.274          | 130.127   | 37.652          | 119.454   |
| 1.0       | 18.325          | 317.604   | 31.660          | 235.343   | 46.306          | 203.339   | 50.548          | 179.001   | 51.398          | 165.987   | 52.850          | 154.791   |
| 1.5       | 25.444          | 331.487   | 40.644          | 251.357   | 56.541          | 221.367   | 57.838          | 197.107   | 61.033          | 186.680   | 63.518          | 175.288   |
| 2.0       | 29.017          | 339.306   | 46.768          | 271.776   | 62.497          | 229.058   | 66.901          | 215.783   | 67.592          | 201.002   | 74.516          | 196.797   |
| 2.5       | 32.038          | 346.772   | 53.898          | 277.855   | 67.259          | 244.044   | 75.089          | 233.163   | 80.237          | 223.183   | 82.000          | 213.727   |
| 3.0       | 32.862          | 346.308   | 58.177          | 289.765   | 72.959          | 261.849   | 79.018          | 241.531   | 82.121          | 231.617   | 85.512          | 227.057   |
| 3.5       | 38.565          | 358.474   | 64.583          | 302.758   | 75.602          | 263.329   | 82.806          | 248.632   | 83.173          | 233.865   | 85.980          | 226.275   |
| 4.0       | 42.586          | 364.706   | 63.908          | 303.924   | 80.572          | 274.288   | 87.127          | 258.263   | 86.803          | 234.998   | 87.291          | 230.699   |
| 4.5       | 40.660          | 365.745   | 63.885          | 304.574   | 81.884          | 280.839   | 88.034          | 263.228   | 86.775          | 239.054   | 92.178          | 235.174   |
| 5.0       | 41.338          | 366.072   | 65.736          | 308.961   | 83.582          | 278.220   | 86.466          | 261.533   | 92.409          | 252.090   | 96.143          | 244.914   |
| 5.5       | 41.420          | 367.300   | 66.670          | 309.555   | 83.372          | 280.673   | 88.674          | 262.692   | 94.811          | 258.411   | 94.548          | 241.559   |
| 6.0       | 39.507          | 358.055   | 65.616          | 310.498   | 80.246          | 275.137   | 85.600          | 258.114   | 96.301          | 257.305   | 96.200          | 247.107   |
| 6.5       | 39.183          | 361.945   | 64.817          | 304.547   | 83.969          | 281.306   | 86.963          | 259.135   | 94.494          | 251.074   | 97.919          | 248.049   |
| 7.0       | 42.342          | 368.741   | 64.688          | 300.601   | 82.110          | 280.476   | 86.869          | 256.004   | 90.924          | 248.738   | 102.363         | 257.385   |
| 7.5       | 43.481          | 369.675   | 67.663          | 317.350   | 80.271          | 275.467   | 89.645          | 264.854   | 94.561          | 255.528   | 100.431         | 253.382   |
| 8.0       | 41.460          | 364.875   | 67.032          | 313.035   | 84.788          | 284.645   | 86.027          | 255.960   | 96.395          | 257.746   | 100.643         | 253.030   |
| 8.5       | 42.294          | 368.631   | 68.614          | 313.026   | 81.801          | 279.449   | 89.089          | 263.917   | 97.411          | 264.634   | 101.863         | 259.227   |
| 9.0       | 40.312          | 363.141   | 68.882          | 311.881   | 83.527          | 284.548   | 89.300          | 268.477   | 96.652          | 258.624   | 99.018          | 252.121   |
| 9.5       | 40.252          | 365.321   | 67.941          | 311.958   | 83.249          | 278.558   | 89.195          | 261.130   | 96.226          | 257.105   | 101.387         | 259.242   |
| 10.0      | 40.991          | 358.478   | 65.904          | 311.110   | 83.103          | 277.824   | 91.329          | 264.816   | 91.952          | 249.212   | 100.348         | 255.541   |

(d) 363 K

| Time (ns) | 10 MPa          |           | 15 MPa          |           | 20 MPa          |           | 25 MPa          |           | 30 MPa          |           | 35 MPa          |           |
|-----------|-----------------|-----------|-----------------|-----------|-----------------|-----------|-----------------|-----------|-----------------|-----------|-----------------|-----------|
|           | CO <sub>2</sub> | Crude Oil |
| 0.5       | 11.637          | 306.066   | 21.052          | 226.975   | 28.877          | 174.392   | 32.535          | 149.440   | 35.853          | 137.635   | 34.505          | 119.206   |
| 1.0       | 17.321          | 322.371   | 33.705          | 269.815   | 39.458          | 205.106   | 45.337          | 178.542   | 49.228          | 172.678   | 51.225          | 164.458   |
| 1.5       | 25.057          | 339.370   | 38.737          | 279.308   | 53.867          | 238.995   | 55.879          | 205.739   | 60.141          | 193.698   | 61.031          | 186.845   |
| 2.0       | 27.992          | 343.298   | 45.167          | 290.492   | 59.509          | 250.595   | 66.168          | 228.339   | 69.018          | 214.662   | 74.393          | 208.000   |
| 2.5       | 28.979          | 349.787   | 53.527          | 301.764   | 66.037          | 267.331   | 70.978          | 236.343   | 78.557          | 234.855   | 79.481          | 222.452   |
| 3.0       | 29.543          | 347.322   | 57.494          | 313.025   | 74.967          | 279.431   | 75.274          | 245.778   | 80.365          | 236.896   | 84.040          | 232.187   |
| 3.5       | 31.366          | 348.783   | 56.601          | 306.512   | 73.542          | 278.255   | 72.717          | 242.584   | 83.752          | 242.318   | 89.485          | 246.299   |
| 4.0       | 35.198          | 357.739   | 56.862          | 317.525   | 77.539          | 287.607   | 74.898          | 247.232   | 80.884          | 240.200   | 89.922          | 245.807   |
| 4.5       | 36.076          | 361.367   | 55.867          | 308.317   | 75.829          | 287.470   | 73.302          | 245.976   | 85.407          | 244.215   | 95.033          | 251.845   |
| 5.0       | 35.866          | 360.127   | 59.467          | 318.396   | 74.428          | 283.139   | 77.786          | 246.161   | 81.179          | 241.140   | 94.775          | 256.753   |
| 5.5       | 36.936          | 361.012   | 60.566          | 315.441   | 75.186          | 285.148   | 79.735          | 252.419   | 84.150          | 250.052   | 91.823          | 246.592   |
| 6.0       | 36.489          | 364.989   | 56.934          | 314.819   | 75.742          | 284.551   | 81.443          | 260.699   | 83.086          | 242.518   | 98.775          | 262.599   |
| 6.5       | 36.001          | 358.845   | 58.483          | 314.019   | 76.893          | 282.973   | 82.483          | 263.999   | 85.668          | 249.433   | 96.332          | 259.756   |
| 7.0       | 35.443          | 354.730   | 58.110          | 316.137   | 76.251          | 283.185   | 81.136          | 260.149   | 88.121          | 252.279   | 98.054          | 258.506   |
| 7.5       | 35.263          | 356.386   | 59.241          | 318.735   | 76.617          | 287.044   | 84.219          | 269.756   | 86.788          | 251.058   | 97.496          | 258.338   |
| 8.0       | 35.729          | 360.932   | 61.098          | 323.295   | 75.075          | 285.757   | 85.907          | 267.132   | 90.641          | 256.911   | 97.239          | 258.147   |
| 8.5       | 34.531          | 358.104   | 57.369          | 320.012   | 78.705          | 290.147   | 85.204          | 272.535   | 87.145          | 250.177   | 98.803          | 262.596   |
| 9.0       | 35.408          | 363.076   | 57.441          | 316.237   | 76.358          | 290.237   | 82.726          | 266.286   | 88.404          | 253.861   | 95.452          | 254.173   |
| 9.5       | 35.934          | 364.823   | 55.219          | 309.036   | 75.638          | 288.617   | 86.991          | 273.507   | 91.566          | 256.558   | 95.913          | 256.339   |
| 10.0      | 38.791          | 362.688   | 56.595          | 317.682   | 77.549          | 287.370   | 82.476          | 261.229   | 89.637          | 258.466   | 97.197          | 259.106   |

**(e) 373 K**

| Time (ns) | 10 MPa          |           | 15 MPa          |           | 20 MPa          |           | 25 MPa          |           | 30 MPa          |           | 35 MPa          |           |
|-----------|-----------------|-----------|-----------------|-----------|-----------------|-----------|-----------------|-----------|-----------------|-----------|-----------------|-----------|
|           | CO <sub>2</sub> | Crude Oil |
| 0.5       | 11.505          | 308.750   | 18.719          | 243.101   | 27.359          | 196.574   | 31.150          | 165.101   | 37.017          | 146.843   | 37.919          | 136.045   |
| 1.0       | 20.224          | 327.262   | 28.074          | 267.571   | 39.371          | 221.970   | 47.271          | 208.421   | 54.108          | 192.752   | 52.831          | 172.870   |
| 1.5       | 24.731          | 335.976   | 35.822          | 288.637   | 49.890          | 248.020   | 58.573          | 223.702   | 63.417          | 208.894   | 63.443          | 196.447   |
| 2.0       | 27.789          | 340.562   | 43.614          | 299.066   | 57.725          | 267.353   | 64.874          | 243.222   | 70.273          | 229.026   | 73.281          | 213.448   |
| 2.5       | 27.820          | 351.617   | 47.222          | 307.686   | 62.350          | 274.961   | 68.737          | 251.254   | 69.758          | 229.067   | 77.257          | 229.196   |
| 3.0       | 30.178          | 353.533   | 46.282          | 313.585   | 64.662          | 280.664   | 70.293          | 254.947   | 75.288          | 238.599   | 79.587          | 231.142   |
| 3.5       | 32.759          | 364.843   | 49.285          | 315.013   | 64.443          | 281.270   | 76.908          | 265.262   | 74.940          | 238.104   | 83.459          | 236.387   |
| 4.0       | 32.120          | 360.734   | 49.280          | 315.363   | 68.458          | 289.568   | 76.919          | 268.725   | 78.837          | 249.833   | 84.788          | 241.376   |
| 4.5       | 30.205          | 349.640   | 50.923          | 311.857   | 65.110          | 282.477   | 77.311          | 262.476   | 83.555          | 258.067   | 87.808          | 253.241   |
| 5.0       | 33.382          | 358.877   | 51.892          | 322.345   | 66.007          | 285.754   | 79.255          | 275.099   | 81.973          | 251.397   | 92.871          | 256.130   |
| 5.5       | 31.858          | 356.750   | 51.371          | 315.981   | 69.044          | 288.822   | 82.249          | 276.346   | 85.247          | 262.863   | 91.963          | 252.947   |
| 6.0       | 34.058          | 363.913   | 51.520          | 313.129   | 70.709          | 295.431   | 79.835          | 274.854   | 84.206          | 255.071   | 90.247          | 252.745   |
| 6.5       | 34.516          | 355.931   | 50.488          | 314.013   | 74.472          | 303.190   | 75.242          | 264.456   | 80.588          | 249.424   | 91.706          | 254.376   |
| 7.0       | 35.455          | 365.350   | 54.264          | 323.653   | 76.214          | 305.003   | 78.571          | 269.959   | 83.675          | 255.511   | 86.884          | 247.296   |
| 7.5       | 30.974          | 358.064   | 50.644          | 317.767   | 75.989          | 304.103   | 77.587          | 270.071   | 84.421          | 253.755   | 88.277          | 250.829   |
| 8.0       | 31.993          | 358.153   | 53.371          | 328.832   | 76.418          | 305.135   | 81.222          | 273.688   | 86.151          | 262.376   | 89.909          | 251.234   |
| 8.5       | 33.103          | 360.813   | 53.614          | 322.379   | 76.228          | 302.325   | 81.269          | 277.993   | 87.571          | 263.215   | 94.148          | 261.682   |
| 9.0       | 31.617          | 364.741   | 49.809          | 316.754   | 74.046          | 300.259   | 81.740          | 275.100   | 87.422          | 268.086   | 92.673          | 256.187   |
| 9.5       | 34.261          | 364.471   | 55.777          | 332.395   | 72.041          | 291.554   | 80.079          | 271.855   | 91.829          | 274.457   | 87.054          | 245.353   |
| 10.0      | 31.852          | 363.441   | 52.343          | 320.527   | 70.037          | 290.980   | 79.501          | 267.295   | 91.692          | 275.565   | 89.932          | 252.377   |

**Table S3**

Summarization of some famous empirical correlations.

| Researcher                | Empirical formula                                                                                                                                                   |
|---------------------------|---------------------------------------------------------------------------------------------------------------------------------------------------------------------|
| Lee [52]                  | $MMP = 7.3942 \times 10^b; b = 2.772 - \frac{1519}{492 + 1.8T}$                                                                                                     |
| Alston <i>et al.</i> [53] | $MMP = 6.056 \times 10^{-6} \times (1.8T + 32)^{1.06} \times MW_{C5+}^{1.78} \times \left(\frac{Vol}{Int}\right)^{0.136}$                                           |
| Shokir [54]               | $MMP = -0.068616 \times z^3 + 0.31733 \times z^2 + 4.9804 \times z + 13.432; z = \sum_{n=1}^8 z_n; z_n = A3_n x_n^3 + A2_n x_n^2 + A1_n x_n + A0_n$                 |
| Emera and Sarma [25]      | $MMP = 0.474265308 - 0.0187974 \times MW_{C7+} + (278.6388 \times 10^{-11} \times MW_{C7+}^{3.023} \times e^{809.9 \times MW_{C7+}^{-1.189}}) \times (1.8T_R + 32)$ |
| Cronquist [55]            | $MMP = 0.11027 \times (1.8T + 32)^Y; Y = 0.744206 + (0.0011038 MW_{C5+}) + (0.0015279 Vol)$                                                                         |
| Glazo [56]                | $MMP = 810.0 - 3.404 M_{C7+} + (1.700 \times 10^{-9} M_{C7+}^{3.730} e^{786.8 M_{C7+}^{-1.058}}) T$                                                                 |
| Yellig and Metcalfe [57]  | $MMP = 12.6472 + 0.015531 \times (1.8T + 3.2) + 0.000124192 \times (1.8T + 32)^2 - \frac{716.9427}{1.8T + 32}$                                                      |

**Figure S1**

The number of crude oil atoms passing through the initial interface (a) and its first-order variance (b) with time evolution. (333 K, 10 MPa)

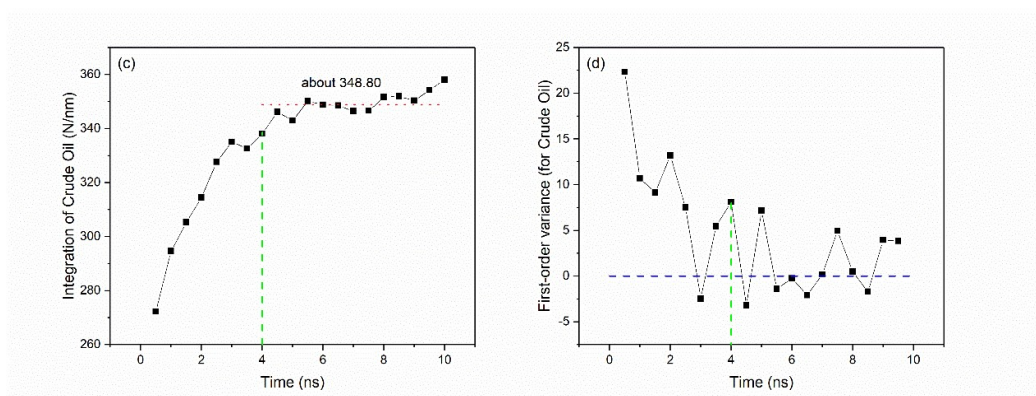



**Figure S2**

Acquisition of MMP in different systems.

343 K, for CO<sub>2</sub> (c), for Crude oil (d).

353 K, for CO<sub>2</sub> (e), for Crude oil (f).

363 K, for CO<sub>2</sub> (g), for Crude oil (h).

373 K, for CO<sub>2</sub> (i), for Crude oil (j).

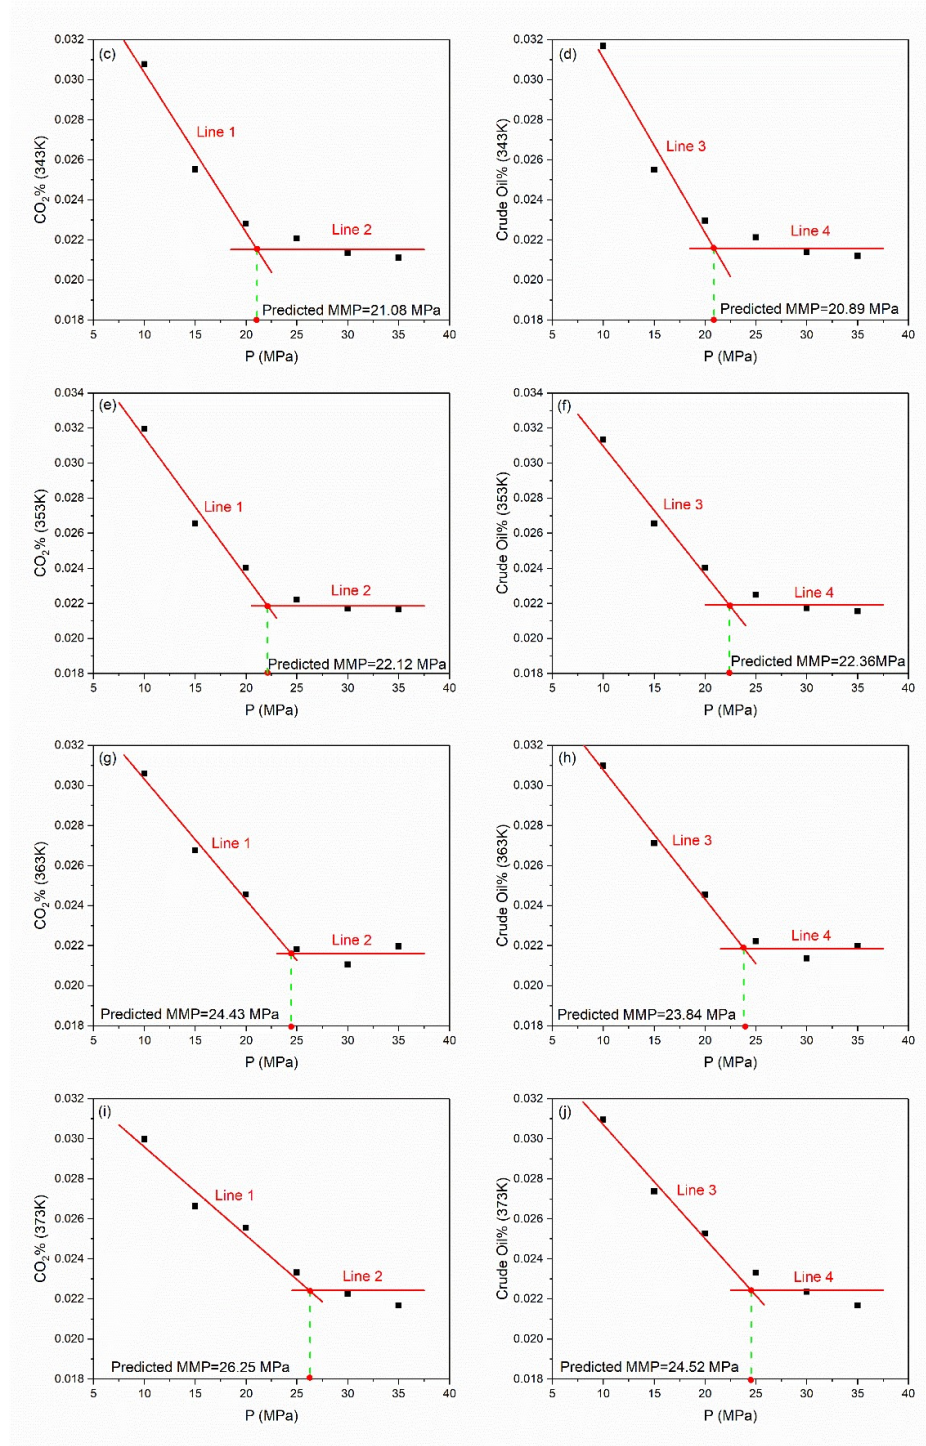

Supplement: s1 [file s1]
